# Supplementary material for: Solutions to Peto's paradox revealed by mathematical modelling and cross-species cancer gene analysis
Source: PubMed Central journal article supplement (PMC4581027; doi:10.1098/rstb.2014.0222), 2015-07-19
Supplement: rstb20140222supp2.pdf [file rstb20140222supp2.pdf]

Electronic Supplementary Material

**Table S1. List of Cancer Genes Used in BLAST Analysis**  
(22 oncogenes; 59 Tumor Suppressor Genes)

| Gene_symbol | EntrezID | Classification |
|-------------|----------|----------------|
| PTPN11      | 5781     | proto-oncogene |
| AKT2        | 208      | proto-oncogene |
| BCL2        | 596      | proto-oncogene |
| BRAF        | 673      | proto-oncogene |
| CDK4        | 1019     | proto-oncogene |
| CTNNB1      | 1499     | proto-oncogene |
| EGFR        | 1956     | proto-oncogene |
| ERBB2       | 2064     | proto-oncogene |
| FBXW7       | 55294    | proto-oncogene |
| FGFR2       | 2263     | proto-oncogene |
| GBAS        | 2631     | proto-oncogene |
| HRAS        | 3265     | proto-oncogene |
| KIT         | 3815     | proto-oncogene |
| KRAS        | 3845     | proto-oncogene |
| MET         | 4233     | proto-oncogene |
| MYC         | 4609     | proto-oncogene |
| MYCL1       | 4610     | proto-oncogene |
| MYCN        | 4613     | proto-oncogene |
| NRAS        | 4893     | proto-oncogene |
| PIK3CA      | 5290     | proto-oncogene |
| REL         | 5966     | proto-oncogene |
| SMO         | 6608     | proto-oncogene |
| APC         | 324      | gatekeeper     |
| BMPR1A      | 657      | gatekeeper     |
| CDH1        | 999      | gatekeeper     |
| CDKN2A      | 1029     | gatekeeper     |
| CEBPA       | 1050     | gatekeeper     |
| CYLD        | 1540     | gatekeeper     |
| EXT1        | 2131     | gatekeeper     |
| EXT2        | 2132     | gatekeeper     |
| FH          | 2271     | gatekeeper     |
| FLT3        | 2322     | gatekeeper     |
| FLT4        | 2324     | gatekeeper     |
| GATA1       | 2623     | gatekeeper     |
| GPC3        | 2719     | gatekeeper     |
| KLF6        | 1316     | gatekeeper     |
| MAP2K4      | 6416     | gatekeeper     |
| MEN1        | 4221     | gatekeeper     |

|         |       |            |
|---------|-------|------------|
| NF1     | 4763  | gatekeeper |
| NF2     | 4771  | gatekeeper |
| PHOX2B  | 8929  | gatekeeper |
| PTEN    | 5728  | gatekeeper |
| RB1     | 5925  | gatekeeper |
| SBDS    | 51119 | gatekeeper |
| SDHB    | 6390  | gatekeeper |
| SDHC    | 6391  | gatekeeper |
| SDHD    | 6392  | gatekeeper |
| SMAD4   | 4089  | gatekeeper |
| SMARCB1 | 6598  | gatekeeper |
| STK11   | 6794  | gatekeeper |
| SUFU    | 51684 | gatekeeper |
| HNF1A   | 6927  | gatekeeper |
| VHL     | 7428  | gatekeeper |
| ATM     | 472   | caretaker  |
| BLM     | 641   | caretaker  |
| BRCA1   | 672   | caretaker  |
| BRCA2   | 675   | caretaker  |
| CHEK2   | 11200 | caretaker  |
| DDB2    | 1643  | caretaker  |
| ERCC2   | 2068  | caretaker  |
| ERCC3   | 2071  | caretaker  |
| ERCC4   | 2072  | caretaker  |
| ERCC5   | 2073  | caretaker  |
| FANCA   | 2175  | caretaker  |
| FANCC   | 2176  | caretaker  |
| FANCD2  | 2177  | caretaker  |
| FANCE   | 2178  | caretaker  |
| FANCF   | 2188  | caretaker  |
| FANCG   | 2189  | caretaker  |
| MLH1    | 4292  | caretaker  |
| MSH2    | 4436  | caretaker  |
| MSH6    | 2956  | caretaker  |
| MUTYH   | 4595  | caretaker  |
| NBN     | 4683  | caretaker  |
| PMS1    | 5378  | caretaker  |
| PMS2    | 5395  | caretaker  |
| RECQL4  | 9401  | caretaker  |
| TP53    | 7157  | caretaker  |
| WRN     | 7486  | caretaker  |
| XPA     | 7507  | caretaker  |
| XPC     | 7508  | caretaker  |

| genus       | species    | mass(kg) | lifespan | ONC | CT | GK | MRCA |
|-------------|------------|----------|----------|-----|----|----|------|
| Macaca      | mulatta    | 8.235    | 40       | 46  | 22 | 36 | 25   |
| Pan         | trogodytes | 44.984   | 59.4     | 49  | 24 | 38 | 6    |
| Canis       | familiaris | 40       | 24       | 42  | 26 | 39 | 97   |
| Equus       | caballus   | 250      | 57       | 45  | 23 | 38 | 97   |
| Bos         | taurus     | 750      | 20       | 28  | 16 | 23 | 97   |
| Mus         | musculus   | 0.0205   | 4        | 35  | 25 | 32 | 91   |
| Rattus      | norvegicus | 0.3      | 5        | 55  | 27 | 43 | 91   |
| Monodelphis | domestica  | 0.105    | 5.1      | 51  | 17 | 40 | 145  |

**Table S2. Data used for linear model based on BLAST-analysis of cancer genes.** Body mass data [1, 2] and the evolutionary distance from humans was taken from the literature [3-7]. ONC: oncogene; CT: caretaker; GK: gatekeeper; MRCA: most recent common ancestor with homo sapiens.

**Table S3. Matrix of 830 Tumor Suppressor Genes used in Copy Number Analysis and the Number of Copies found in each of the 36 Mammals.** Each row is a gene and each column is a mammalian species (see separate ESM file).

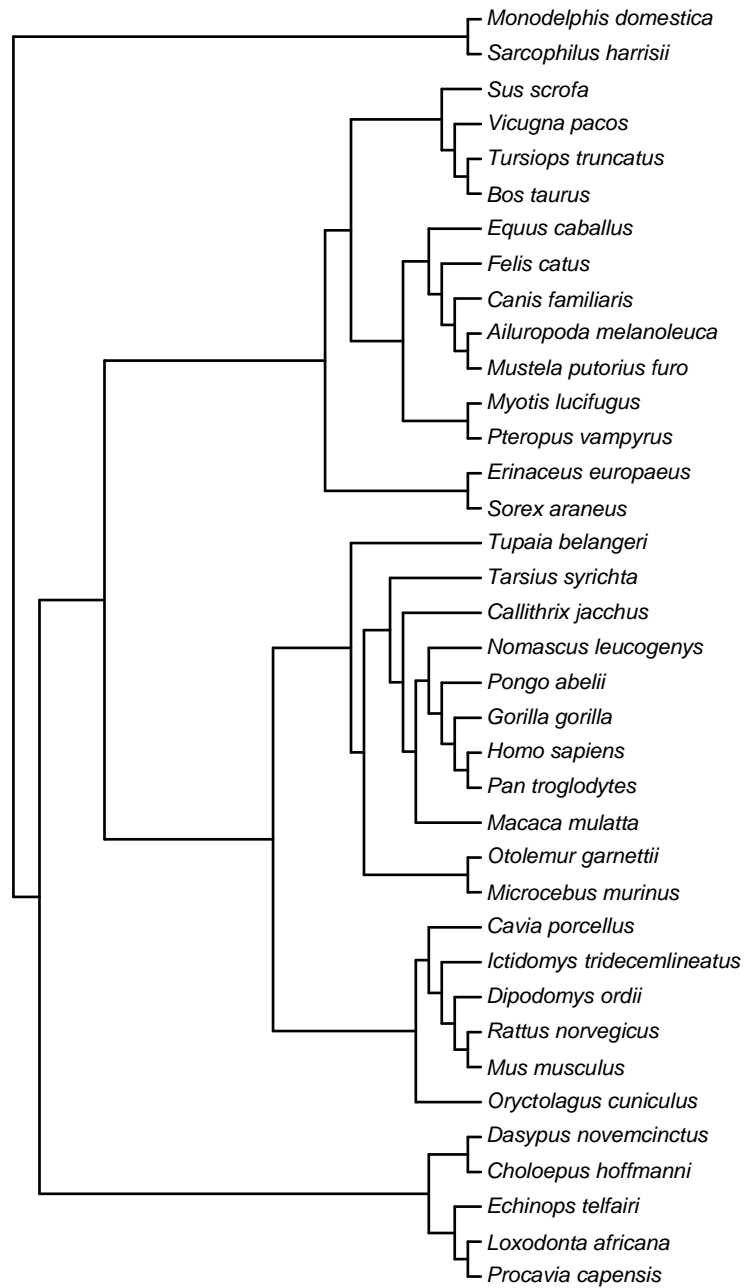

**Figure S1. Phylogeny of 36 mammalian species used in the copy number of cancer genes analysis.** The newick file of the phylogeny for all species in Ensembl was downloaded from Ensembl's gitHub repository (release 79) and plotted with the *ape* package in R. Species that were not used in this analysis but were in the Ensembl tree file were removed from the tree. *Homo sapiens* are shown for context.

1. de Magalhães, J.P. and J. Costa, *A database of vertebrate longevity records and their relation to other life-history traits*. *Journal of evolutionary biology*, 2009. **22**(8): p. 1770-1774.
2. Smith, F.A., *Body mass of late Quaternary mammals*, in *Ecology*. 2003. p. 3403.
3. Bininda-Emonds, O.R., et al., *The delayed rise of present-day mammals*. *Nature*, 2007. **446**(7135): p. 507-12.
4. Chen, F.C. and W.H. Li, *Genomic divergences between humans and other hominoids and the effective population size of the common ancestor of humans and chimpanzees*. *Am J Hum Genet*, 2001. **68**(2): p. 444-56.
5. Gibbs, R.A., et al., *Evolutionary and biomedical insights from the rhesus macaque genome*. *Science*, 2007. **316**(5822): p. 222-34.
6. Murphy, W.J., et al., *Using genomic data to unravel the root of the placental mammal phylogeny*. *Genome Res*, 2007. **17**(4): p. 413-21.
7. Patterson, N., et al., *Genetic evidence for complex speciation of humans and chimpanzees*. *Nature*, 2006. **441**(7097): p. 1103-8.
